# Supplementary material for: Safety and Pharmacokinetics of Intravenous and Oral Fosmanogepix, a First-in-Class Antifungal Agent, in Healthy Volunteers
Source: PubMed Central journal article supplement (PMC10112065; doi:10.1128/aac.01623-22), 2023-03-29
Supplement: aac.01623-22-s0001.pdf [file aac.01623-22-s0001.pdf]

1 **Supplemental material for publication**

2

3 **Supplemental figure legends**

4 **Supplemental figure 1: Relationship between the (A)  $C_{\max}$  and (B)  $AUC_{\text{inf}}$  and dose**  
5 **of MGX after single oral dose of FMGX in participants under *ante cibum* conditions**  
6 **(SAD cohort)**

7 Abbreviations:  $AUC_{\text{inf}}$  = area under the concentration-time curve from time zero to  
8 infinity;  $C_{\max}$  = maximum plasma concentration; FMGX = fosmanogepix; n = number of  
9 participants; MGX = manogepix; SAD = single ascending dose.

10 Data are presented for Study 2 Cohort 1a as geometric mean MGX plasma concentrations  
11 for participants in the PK population (n = 6-8 per group) using a linear scale.

12

13 **Supplemental figure 2. Single-dose MGX concentration profile under *post cibum***  
14 **and *ante cibum* conditions**

15 Abbreviations: MGX = manogepix; n = number of participants; PK = pharmacokinetics;  
16 PO = oral.

17 Data are presented for Study 2 Cohort 1b as geometric mean MGX plasma concentrations  
18 for participants in the PK population (n = 8 per group) using a linear scale.

19 For the *post cibum* condition, the dose was administered 30 minutes after the start of a  
20 standardized breakfast.

21

22

23 Supplemental figure 1: Relationship between the (A)  $C_{max}$  and (B)  $AUC_{(inf)}$  and dose  
24 of MGX after single oral dose of FMGX in participants under *ante cibum* conditions  
25 (SAD cohort)

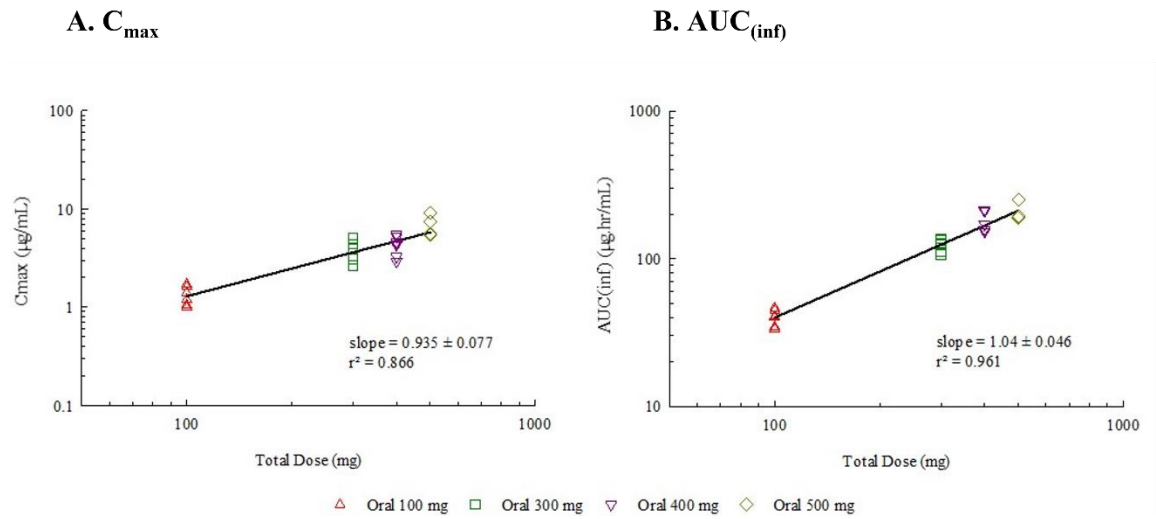

26  
27

28 Supplemental figure 2. Single-dose MGX concentration profile under *post cibum*  
29 and *ante cibum* conditions

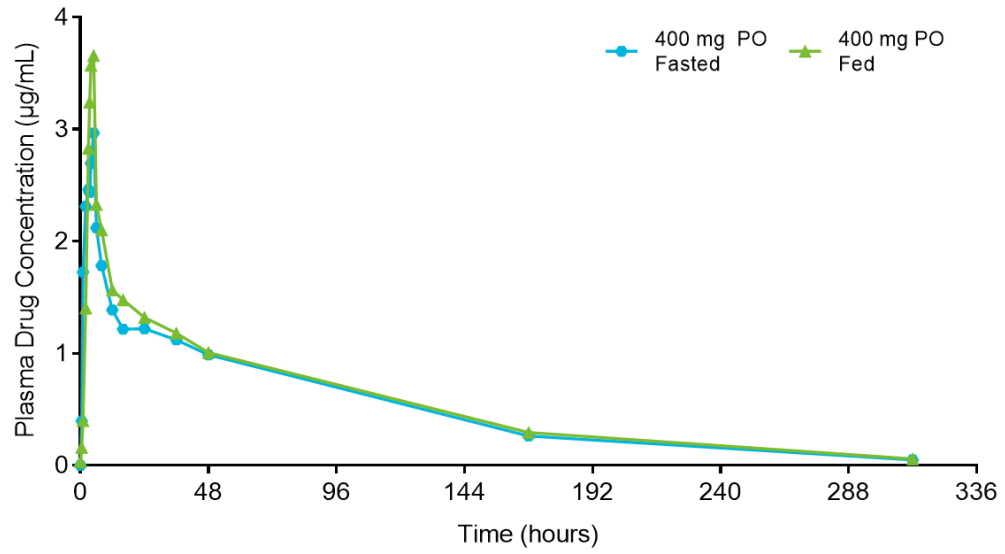

30  
31

32 **Supplemental table 1. Drug-related treatment-emergent adverse events by system organ class and preferred terms during**  
 33 **Study 1 and Study 2**

| Preferred Term<br>E/n (%)  | Study 1 (IV) |                   |             |                   |                 |                 |             |                        | Study 2 (IV and PO) |                      |             |                                              |                                              |            |                          |
|----------------------------|--------------|-------------------|-------------|-------------------|-----------------|-----------------|-------------|------------------------|---------------------|----------------------|-------------|----------------------------------------------|----------------------------------------------|------------|--------------------------|
|                            | Cohorts 1-6  |                   | Cohort 7-10 |                   | Cohorts 11a-11d |                 | Cohort 12   |                        | Cohort 1a           |                      | Cohort 1b   |                                              | Cohorts 2 and 3                              |            |                          |
|                            | PBO<br>n=12  | 10-350 mg<br>n=36 | PBO<br>n=8  | 50-600 mg<br>n=24 | PBO<br>n=8      | 1000 mg<br>n=24 | PBO<br>n=2  | 1000→<br>600 mg<br>n=6 | PBO<br>n=2          | 100-500<br>mg<br>n=6 | PBO<br>n=2  | 400 mg<br><i>Ante</i><br><i>cibum</i><br>n=8 | 400 mg<br><i>Post</i><br><i>cibum</i><br>n=8 | PBO<br>n=4 | 500 &<br>1000 mg<br>n=12 |
| Any                        | 2/2<br>(17)  | 4/3<br>(8)        | 0           | 27/5<br>(21)      | 0               | 29/12<br>(50)   | 1/1<br>(50) | 19/6<br>(100)          | 0                   | 0                    | 1/1<br>(50) | 8/5<br>(63)                                  | 0                                            | 0          | 79/6<br>(50)             |
| Gastrointestinal disorders | 1/1<br>(8)   | 2/1<br>(3)        | 0           | 11/2<br>(8)       | 0               | 9/6 (25)        | 0           | 12/6<br>(100)          | 0                   | 0                    | 0           | 5/4<br>(50)                                  | 0                                            | 0          | 61/6<br>(50)             |
| Diarrhoea                  | 0            | 0                 | 0           | 0                 | 0               | 0               | 0           | 0                      | 0                   | 0                    | 0           | 1/1<br>(13)                                  | 0                                            | 0          | 0                        |
| Nausea                     | 1/1<br>(8)   | 2/1<br>(3)        | 0           | 7/1<br>(4)        | 0               | 6/6<br>(25)     | 0           | 9/6<br>(100)           | 0                   | 0                    | 0           | 4/4<br>(50)                                  | 0                                            | 0          | 42/6<br>(50)             |
| Vomiting                   | 0            | 0                 | 0           | 1/1<br>(4)        | 0               | 3/3<br>(13)     | 0           | 3/3<br>(50)            | 0                   | 0                    | 0           | 0                                            | 0                                            | 0          | 18/5<br>(42)             |
| Dyspepsia                  | 0            | 0                 | 0           | 0                 | 0               | 0               | 0           | 0                      | 0                   | 0                    | 0           | 0                                            | 0                                            | 0          | 1/1<br>(8)               |
| Abdominal discomfort       | 0            | 0                 | 0           | 3/1<br>(4)        | 0               | 0               | 0           | 0                      | 0                   | 0                    | 0           | 0                                            | 0                                            | 0          | 0                        |
| Nervous system disorders   | 1/1<br>(8)   | 2/2<br>(6)        | 0           | 6/3<br>(13)       | 0               | 18/10<br>(42)   | 0           | 4/3<br>(50)            | 0                   | 0                    | 1/1<br>(50) | 3/3<br>(38)                                  | 0                                            | 0          | 1/1(8)                   |
| Headache                   | 1/1<br>(8)   | 1/1<br>(3)        | 0           | 1/1<br>(4)        | 0               | 7/4<br>(17)     | 0           | 2/2<br>(33)            | 0                   | 0                    | 1/1<br>(50) | 3/3<br>(38)                                  | 0                                            | 0          | 0                        |



|                                                 |   |   |   |            |   |            |             |             |   |   |   |   |   |   |            |
|-------------------------------------------------|---|---|---|------------|---|------------|-------------|-------------|---|---|---|---|---|---|------------|
| Infusion site pain                              | 0 | 0 | 0 | 0          | 0 | 1/1<br>(4) | 0           | 1/1<br>(17) | 0 | 0 | 0 | 0 | 0 | 0 | 0          |
| Infusion site irritation                        | 0 | 0 | 0 | 0          | 0 | 0          | 1/1<br>(50) | 2/2<br>(33) | 0 | 0 | 0 | 0 | 0 | 0 | 0          |
| Vascular disorder                               | 0 | 0 | 0 | 3/2<br>(8) | 0 | 0          | 0           | 0           | 0 | 0 | 0 | 0 | 0 | 0 | 0          |
| Hot flush                                       | 0 | 0 | 0 | 3/2<br>(8) | 0 | 0          | 0           | 0           | 0 | 0 | 0 | 0 | 0 | 0 | 0          |
| Respiratory, thoracic and mediastinal disorders | 0 | 0 | 0 | 1/1<br>(4) | 0 | 0          | 0           | 0           | 0 | 0 | 0 | 0 | 0 | 0 | 0          |
| Painful respiration                             | 0 | 0 | 0 | 1/1<br>(4) | 0 | 0          | 0           | 0           | 0 | 0 | 0 | 0 | 0 | 0 | 0          |
| Injury, poisoning and procedural complications  | 0 | 0 | 0 | 1/1<br>(4) | 0 | 0          | 0           | 0           | 0 | 0 | 0 | 0 | 0 | 0 | 1/1<br>(8) |
| Procedural vomiting                             | 0 | 0 | 0 | 0          | 0 | 0          | 0           | 0           | 0 | 0 | 0 | 0 | 0 | 0 | 1/1<br>(8) |
| Procedural nausea                               | 0 | 0 | 0 | 1/1<br>(4) | 0 | 0          | 0           | 0           | 0 | 0 | 0 | 0 | 0 | 0 | 0          |

34 Abbreviations: E = events; FMGX = fosmanogepix; IV = intravenous; n = number of participants; PBO = placebo; PO = oral.  
35 Data are events/n (%) of participants in the Safety Population. All events reported in the FMGX treatment group in Cohorts 7-10 and  
36 Cohorts 2 and 3 were in the 600 mg and 1000 mg groups, respectively.  
37
